# Supplementary material for: Nonpareil 3: Fast Estimation of Metagenomic Coverage and Sequence Diversity
Source: PubMed Central journal article supplement (PMC5893860; doi:10.1128/msystems.00039-18), 2018-04-10

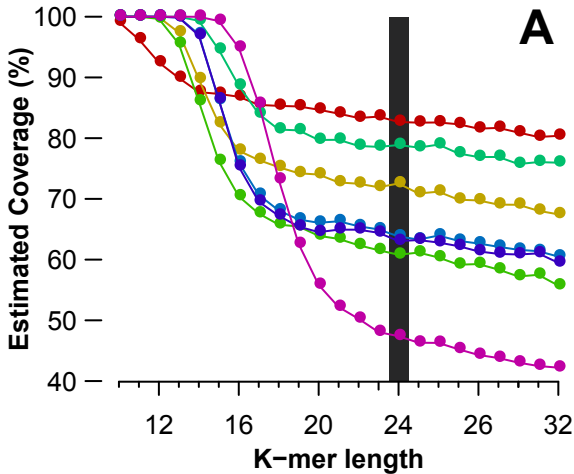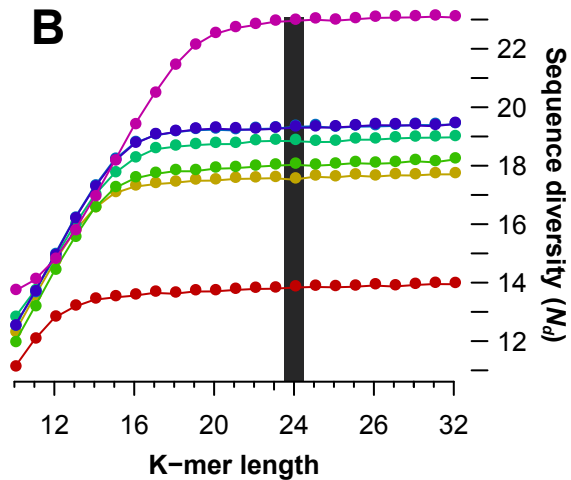

- Posterior Fornix
- Stool
- Tongue Dorsum
- Lake Lanier 2011
- Lake Lanier 2009B
- Lake Lanier 2009A
- Iowa Continuous Corn

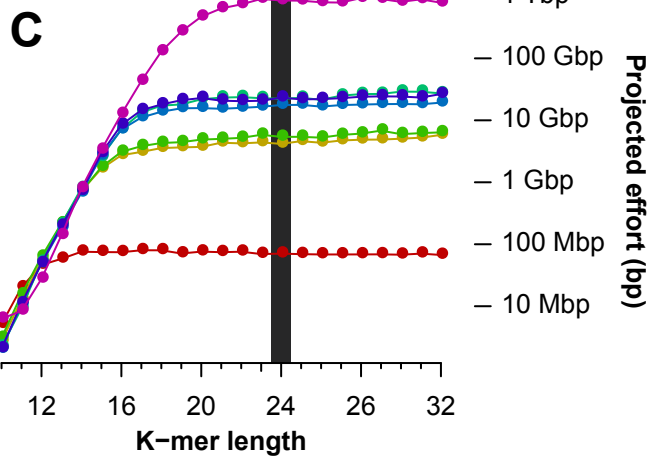

Supplement: sys003182225sf2.pdf [file sys003182225sf2.pdf]
