# Supplementary material for: Nonpareil 3: Fast Estimation of Metagenomic Coverage and Sequence Diversity
Source: PubMed Central journal article supplement (PMC5893860; doi:10.1128/msystems.00039-18), 2018-04-10

**K-mer kernel**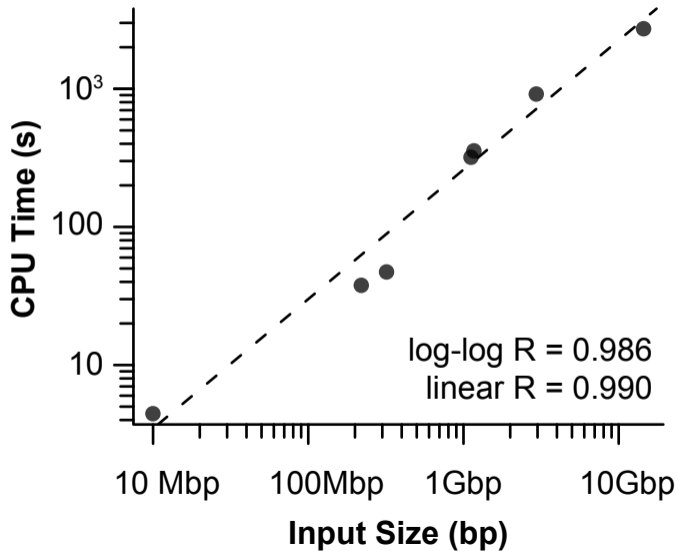**Alignment kernel**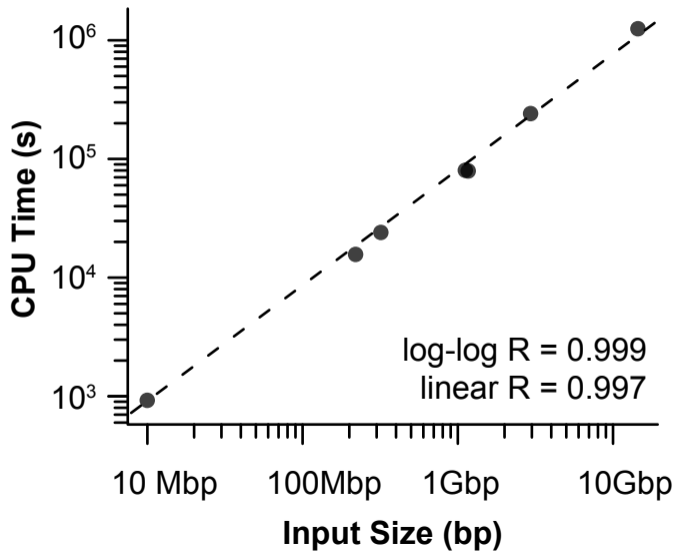

Supplement: sys003182225sf3.pdf [file sys003182225sf3.pdf]
