# Supplementary material for: Nonpareil 3: Fast Estimation of Metagenomic Coverage and Sequence Diversity
Source: PubMed Central journal article supplement (PMC5893860; doi:10.1128/msystems.00039-18), 2018-04-10

## A. Low coverage

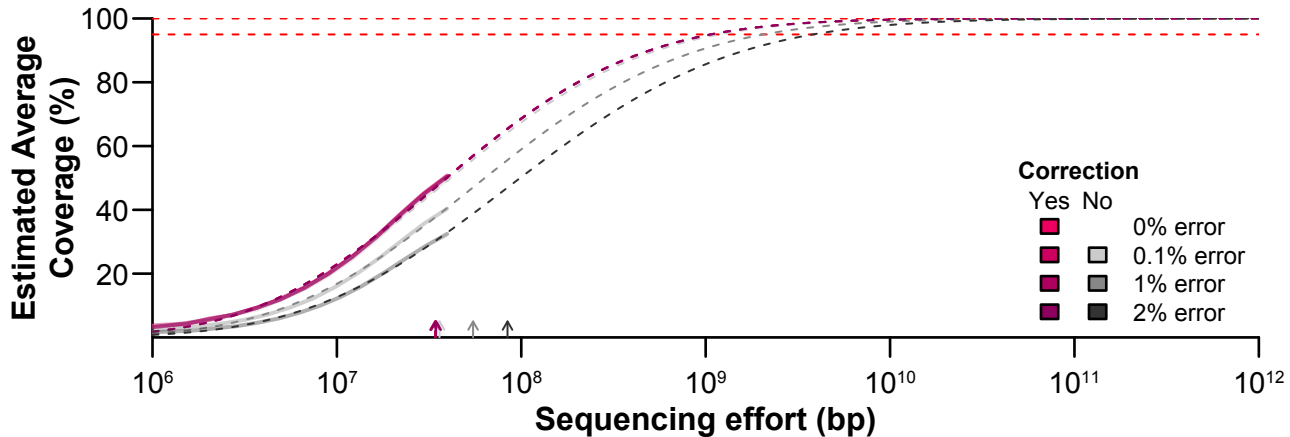

## B. High coverage

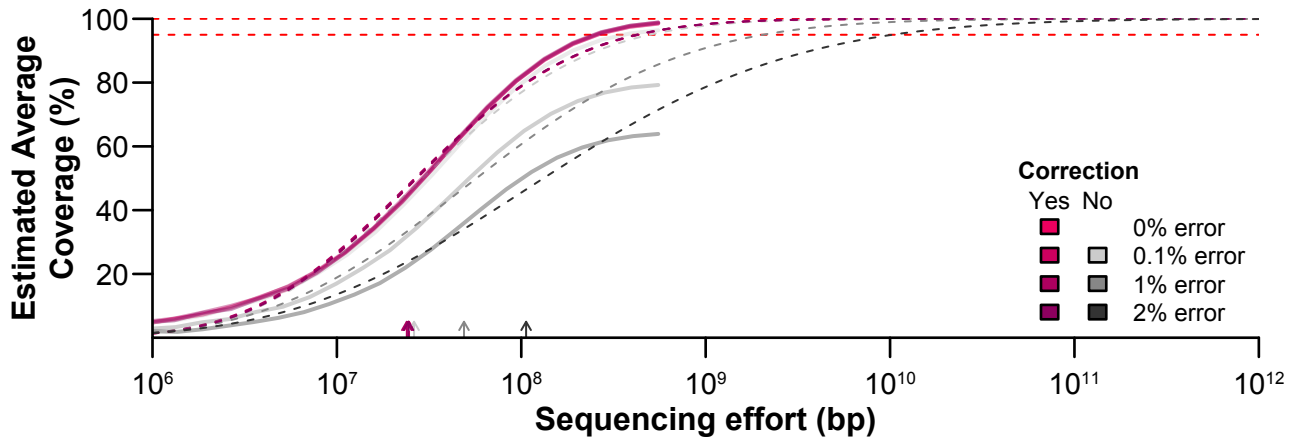

Supplement: sys003182225sf4.pdf [file sys003182225sf4.pdf]
