# Supplementary material for: Nonpareil 3: Fast Estimation of Metagenomic Coverage and Sequence Diversity
Source: PubMed Central journal article supplement (PMC5893860; doi:10.1128/msystems.00039-18), 2018-04-10
Supplement: sys003182225st1.pdf [file sys003182225st1.pdf]

**Supplementary Table S1.** Genomes used for simulated datasets to evaluate error correction.

| <b>Entry</b> | <b>Size (bp)</b> | <b>Abundance (%)<sup>1</sup></b> |
|--------------|------------------|----------------------------------|
| NC_015189.1  | 5,178            | 6.33                             |
| NC_010940.1  | 3,533            | 1.00                             |
| NC_010580.1  | 181,736          | 1.78                             |
| NC_017867.1  | 1,938,822        | 2.71                             |
| NC_015052.1  | 2,400,312        | 0.45                             |
| NC_015920.1  | 29,448           | 1.02                             |
| NC_009713.1  | 3,678            | 4.58                             |
| NC_015914.1  | 6,221,273        | 4.95                             |
| NC_008255.1  | 4,433,218        | 0.06                             |
| NC_011661.1  | 1,855,560        | 0.54                             |
| NC_017910.1  | 4,158,725        | 2.20                             |
| NC_017631.1  | 5,131,397        | 5.55                             |
| NC_011419.1  | 100,021          | 1.27                             |
| NC_017642.1  | 90,868           | 1.75                             |
| NC_014558.2  | 53560            | 10.8                             |
| NC_013199.1  | 2968598          | 5.25                             |
| NC_008576.1  | 4719581          | 1.51                             |
| NC_014002.1  | 2012424          | 1.57                             |
| NC_010727.1  | 25164            | 0.54                             |
| NC_014563.1  | 165693           | 7.18                             |
| NC_016818.1  | 4861101          | 2.56                             |
| NC_007908.1  | 4712337          | 2.84                             |
| NC_015729.1  | 63532            | 0.90                             |
| NC_007954.1  | 4545906          | 4.43                             |

---

|             |         |      |
|-------------|---------|------|
| NC_010506.1 | 5935403 | 5.19 |
| NC_014009.1 | 5398    | 10.0 |
| NC_017098.1 | 3285855 | 1.00 |
| NC_015757.1 | 3551206 | 4.74 |
| NC_017268.1 | 1139281 | 1.69 |
| NC_016842.1 | 1139330 | 5.58 |

---

<sup>1</sup> Relative abundance of reads.
