# Supplementary material for: Nonpareil 3: Fast Estimation of Metagenomic Coverage and Sequence Diversity
Source: PubMed Central journal article supplement (PMC5893860; doi:10.1128/msystems.00039-18), 2018-04-10
Supplement: sys003182225st2.pdf [file sys003182225st2.pdf]

**Supplementary Table S2.** Nonpareil error correction for  $k$ -mer kernel.

| Error Rate  | Coverage (%)    |                  | Req. effort (Gbp) |                  |
|-------------|-----------------|------------------|-------------------|------------------|
|             | On <sup>1</sup> | Off <sup>2</sup> | On <sup>1</sup>   | Off <sup>2</sup> |
| <b>0.0%</b> | <b>51</b>       | <b>51</b>        | <b>1.06</b>       | <b>1.06</b>      |
| 0.1%        | 51              | 49               | 1.06              | 1.18             |
| 1.0%        | 50              | 40               | 1.07              | 2.06             |
| 2.0%        | 50              | 32               | 1.07              | 3.82             |
| <b>0.0%</b> | <b>99</b>       | <b>99</b>        | <b>0.43</b>       | <b>0.43</b>      |
| 0.1%        | 98              | 96               | 0.43              | 0.50             |
| 1.0%        | 99              | 79               | 0.43              | 2.05             |
| 2.0%        | 99              | 64               | 0.42              | 10.3             |

<sup>1</sup> Nonpareil with  $k$ -mer kernel and error correction.

<sup>2</sup> Nonpareil with  $k$ -mer kernel and without error correction.
