# Supplementary material for: Nonpareil 3: Fast Estimation of Metagenomic Coverage and Sequence Diversity
Source: PubMed Central journal article supplement (PMC5893860; doi:10.1128/msystems.00039-18), 2018-04-10
Supplement: sys003182225st3.pdf [file sys003182225st3.pdf]

**Supplementary Table S3.** Metagenomic samples from diverse environments used in this study.

| <b>Project<sup>1</sup></b> | <b>Sample<sup>1</sup></b> | <b>Run<sup>1</sup></b> | <b>Platform</b> | <b>Biome / Sample Name</b>  |
|----------------------------|---------------------------|------------------------|-----------------|-----------------------------|
| <b>Animal Host</b>         |                           |                        |                 |                             |
| ERP014522                  | ERS1079001                | ERR1307052             | Illumina        | Broiler Caecum              |
| ERP005429                  | ERS428046                 | ERR469647              | Ion Torrent     | Gir Cow Rumen               |
| SRP056641                  | SRS971427                 | SRR2240256             | Illumina        | Human Anterior nares        |
| SRP056641                  | SRS1055060                | SRR2241209             | Illumina        | Human Buccal mucosa         |
| ERP005507                  | ERS430636                 | ERR472949              | Illumina        | Human Medieval Skeleton     |
| ERP006678                  | ERS537696                 | ERR589719              | Illumina        | Human Rheumatoid Gut        |
| ERP011339                  | ERS805755                 | ERR981247              | Illumina        | Human Skin                  |
| SRP056641                  | SRS1041031                | SRR2175645             | Illumina        | Human Stool                 |
| SRP056641                  | SRS893385                 | SRR1952623             | Illumina        | Human Supragingival plaque  |
| SRP056641                  | SRS893352                 | SRR1952591             | Illumina        | Human Tongue dorsum         |
| ERP005462                  | ERS428192                 | ERR470082              | Ion Torrent     | Kankrej Cow Rumen           |
| ERP020572                  | ERS1474381                | ERR1762125             | Illumina        | Mouse Colitis Stool         |
| ERP006800                  | ERS569458                 | ERR658091              | Illumina        | Mouse DarkPhase Stool       |
| ERP020572                  | ERS1474383                | ERR1762111             | Illumina        | Mouse Stool                 |
| ERP015203                  | ERS1122653                | ERR1367842             | Illumina        | Mouse Stool                 |
| ERP013165                  | ERS970408                 | ERR1135432             | Illumina        | Pig Stool                   |
| ERP013942                  | ERS1037701                | ERR1223843             | Illumina        | Pig Stool B                 |
| ERP021211                  | ERS1566221                | ERR1854461             | Illumina        | Salmon Faeces               |
| <b>Engineered</b>          |                           |                        |                 |                             |
| ERP011345                  | ERS805497                 | ERR977414              | Illumina        | Austria Petrochemical Waste |
| SRP046072                  | SRS693743                 | SRR1562011             | Illumina        | China Liquor 20y            |
| SRP046072                  | SRS693731                 | SRR1561999             | Illumina        | China Liquor 220y           |

|           |            |            |          |                             |
|-----------|------------|------------|----------|-----------------------------|
| SRP046072 | SRS693721  | SRR1561989 | Illumina | China Liquor 440y           |
| SRP046072 | SRS693735  | SRR1562003 | Illumina | China Liquor 50y            |
| ERP009124 | ERS632930  | ERR712390  | Illumina | Danish Activated Sludge     |
| ERP011345 | ERS805491  | ERR977425  | Illumina | Danish Petrochemical Waste  |
| ERP015410 | ERS1215587 | ERR1467155 | Illumina | Danish Wastewater           |
| ERP005835 | ERS627438  | ERR699788  | Illumina | France Cheese               |
| ERP011345 | ERS805499  | ERR977420  | Illumina | German Petrochemical Waste  |
| ERP014522 | ERS1078367 | ERR1306535 | Illumina | Italy Broiler Meat          |
| SRP003198 | SRS211744  | SRR256754  | 454      | Kimchi                      |
| ERP011345 | ERS805494  | ERR977405  | Illumina | Russian Petrochemical Waste |
| ERP021211 | ERS1545971 | ERR1823566 | Illumina | Salmon Feed                 |
| ERP015657 | ERS1162552 | ERR1414231 | Illumina | Swedish Activated Sludge    |
| ERP015657 | ERS1162594 | ERR1414273 | Illumina | Swedish Primary Sludge      |
| ERP015657 | ERS1162544 | ERR1414223 | Illumina | Swedish Wastewater          |

---

**Enrichment**

|           |            |            |          |                                                      |
|-----------|------------|------------|----------|------------------------------------------------------|
| ERP016191 | ERS1276023 | ERR1554596 | Illumina | <i>Achromatium</i> populations<br>from Lake Stechlin |
| ERP010072 | ERS700853  | ERR845264  | Illumina | Methanesulfonate<br>Enrichment                       |
| SRP013339 | SRS334564  | SRR500503  | Illumina | Naphtalene Enrichment                                |
| ERP017906 | ERS1408748 | ERR1688863 | Illumina | Oil Enrichment                                       |

---

**Freshwater**

|           |            |            |             |                                      |
|-----------|------------|------------|-------------|--------------------------------------|
| ERP013793 | ERS1030529 | ERR1201173 | Illumina    | Alpine Glacier                       |
| ERP006615 | ERS524244  | ERR575705  | Illumina    | Australia Bilabong Uranyl            |
| ERP016382 | ERS1245396 | ERR1527265 | Illumina    | Australia Groundwater<br>Radioactive |
| ERP021244 | ERS1532239 | ERR1816708 | Ion Torrent | Curua Una River                      |

|           |            |                                       |             |                                  |
|-----------|------------|---------------------------------------|-------------|----------------------------------|
| ERP016063 | ERS1443742 | ERR1725848                            | Illumina    | Daisy Lake                       |
| ERP021394 | ERS1546685 | ERR1824222                            | 454         | Diamante River                   |
| ERP009117 | ERS632771  | ERR711863                             | Illumina    | Dianchi Lake                     |
| SRP080009 | SRS1589004 | SRR3960573                            | Illumina    | Lake Mendota                     |
| ERP013741 | ERS1027341 | ERR1198911                            | Illumina    | Mobile Cave Water                |
| ERP016482 | ERS1261403 | ERR1544444                            | Illumina    | Nakdong River                    |
| SRP000240 | SRS000608  | SRR002326,SRR<br>002327,SRR0023<br>28 | 454         | Northern Schneeferner<br>Glacier |
| ERP013793 | ERS1030534 | ERR1201178                            | Illumina    | Pakistan Glacier                 |
| ERP013033 | ERS950426  | ERR1104488                            | Illumina    | Rabindra Sarovar Lake            |
| ERP012868 | ERS956539  | ERR1121555                            | Ion Torrent | Svalbard Glacier                 |
| ERP020465 | ERS1467323 | ERR1750013                            | Ion Torrent | Tucurui Lake                     |
| ERP016258 | ERS1222671 | ERR1474558                            | Illumina    | Xiangxi River                    |

---

**Marine**

---

|           |            |                                                                                 |          |                                     |
|-----------|------------|---------------------------------------------------------------------------------|----------|-------------------------------------|
| ERP001736 | ERS487936  | ERR598950                                                                       | Illumina | Alboran Sea                         |
| SRP039390 | SRS581965  | SRR1204581                                                                      | Illumina | Amazon Plume                        |
| ERP001736 | ERS489074  | ERR599053                                                                       | Illumina | Arabian Sea                         |
| ERP004692 | ERS399638  | ERR420363,<br>ERR420364,<br>ERR420365,<br>ERR420366,<br>ERR420367,<br>ERR420368 | Illumina | Axial Seamount<br>Hydrothermal Vent |
| ERP018210 | ERS1418479 | ERR1698987                                                                      | Illumina | Copano Bay                          |
| ERP018210 | ERS1418469 | ERR1698980                                                                      | Illumina | Galveston Bay                       |
| ERP001736 | ERS489315  | ERR599138                                                                       | Illumina | Indian Sea                          |

|           |            |            |             |                               |
|-----------|------------|------------|-------------|-------------------------------|
| ERP001736 | ERS488509  | ERR599094  | Illumina    | Mediterranean Sea             |
| ERP017354 | ERS1370021 | ERR1662525 | Illumina    | MidCayman Rise<br>Subseafloor |
| ERP008814 | ERS612887  | ERR688354  | Illumina    | Noosa Estuary                 |
| ERP001736 | ERS494374  | ERR598958  | Illumina    | North Atlantic Ocean          |
| ERP001736 | ERS493372  | ERR598980  | Illumina    | North Pacific Ocean           |
| ERP018210 | ERS1418484 | ERR1698991 | Illumina    | Nueces Bay                    |
| ERP001736 | ERS488545  | ERR599106  | Illumina    | Red Sea                       |
| ERP001736 | ERS490433  | ERR598984  | Illumina    | South Atlantic Ocean          |
| ERP001736 | ERS491804  | ERR599024  | Illumina    | South Pacific Ocean           |
|           |            |            |             | <b>Soil</b>                   |
| SRP039575 | SRS567760  | SRR1185960 | Illumina    | Arsenic Antimony Soil         |
| ERP008551 | ERS580791  | ERR671919  | Illumina    | Australian Calcarosols        |
| ERP004852 | ERS402379  | ERR430975  | Ion Torrent | Australian Forest             |
| ERP008551 | ERS580784  | ERR671939  | Illumina    | Australian Tenosols           |
| ERP008551 | ERS580794  | ERR671913  | Illumina    | Australian Vertosols          |
| ERP014473 | ERS1075580 | ERR1303295 | Illumina    | Florianopolis Dune            |
| ERP014473 | ERS1075581 | ERR1303296 | Illumina    | Florianopolis Forest          |
| SRP046227 | SRS697016  | SRR1569466 | Illumina    | Florida Beach Sediments       |
| SRP017930 | SRS386691  | SRR650839  | Illumina    | Konjac Plowland               |
| SRP033484 | SRS510679  | SRR1042602 | Ion Torrent | Kutch Saline Desert Soil      |
| SRP029969 | SRS481052  | SRR988096  | Illumina    | Oklahoma Grassland            |
| SRP018858 | SRS398270  | SRR770299  | Illumina    | Swamp                         |
| SRP008617 | SRS265882  | SRP008617  | Illumina    | Wisconsin Corn Soil           |
| SRP008628 | SRS265900  | SRP008628  | Illumina    | Wisconsin Native Prairie      |
| SRP008595 | SRS265861  | SRP008595  | Illumina    | Wisconsin Switchgrass Soil    |
|           |            |            |             | <b>Mock</b>                   |

---

|                 |                 |                         |          |                    |
|-----------------|-----------------|-------------------------|----------|--------------------|
| PRJNA48475      | SAMN00120089    | SRR172903 <sup>2</sup>  | Illumina | HMP Mock Staggered |
| PRJNA48475      | SAMN00120089    | SRR072232 <sup>2</sup>  | 454      | HMP Mock Staggered |
| PRJNA48475      | SAMN00120088    | SRR172902 <sup>2</sup>  | Illumina | HMP Mock Even      |
| PRJNA48475      | SAMN00120088    | SRR072233 <sup>2</sup>  | 454      | HMP Mock Even      |
| PRJNA324704     | SAMN05213576    | SRR3656745 <sup>2</sup> | Illumina | MBARC-26           |
| NA <sup>3</sup> | NA <sup>3</sup> | NA <sup>3</sup>         | Illumina | Mock M63H 25M      |

---

<sup>1</sup> Identifiers in EBI Metagenomics, derived from the EBI European Nucleotide Archive (ENA) or the NCBI Sequence Read Archive (SRA).

<sup>2</sup> Not available in EBI Metagenomics, diversity directly estimated from theoretical concentrations.

<sup>3</sup> This dataset was obtained from

[https://mgexamples.s3.climb.ac.uk/MOCK\\_M63H.25M.1.fastq.gz](https://mgexamples.s3.climb.ac.uk/MOCK_M63H.25M.1.fastq.gz).
